# Supplementary material for: Machine Learning-Assisted Classification of Paraffin-Embedded Brain Tumors with Raman Spectroscopy
Source: MDPI journal article supplement (doi:10.3390/brainsci14040301), 2024-03-23
Supplement: s1 [file s1]

## **Supplementary Material**

### **Preprocessing**

Cosmic ray artefacts were removed from individual recordings with a median filter across replicated acquisitions. A trend removal was performed using an iterative use of a custom piecewise Savitzky-Golay filtering and morphological opening of the signal to avoid removing crucial information from the spectrum. Spectra were then cropped in the morphological region (between  $500\text{cm}^{-1}$  and  $2000\text{cm}^{-1}$  on the Raman shift axis) and standardized individually (mean removal and divided by the standard deviation).

### **Machine Learning Pipeline: Data preparation**

The dataset has been split into a training set and a test following a tailored selection taking into account the distribution of patient count in each of the tumors specimen. The aim of this specific split is to assess the generalization of the model over each subcategory of tumors (astrocytomas, oligodendrogliomas, ependymomas, glioblastomas, transitional/meningothelial meningiomas, breast carcinoma, colorectal carcinoma, non-small cell lung carcinoma (NSCLC)), even to model the discrimination of the main category (meningioma, carcinoma, glioma). Hence, the split was performed patient-wise for each subcategory with approximately 75% of the patient count remaining in the training set.

### **Machine Learning Pipeline: Choice of model**

The performance of several machine learning algorithms was compared with internal cross validation (randomly stratified internally, 4 splits, repeated 3 times), together with a set of hyperparameters for each of them (optimized on a grid). The methodology considered linear and nonlinear algorithms, those were: Logistic Regression, Random Forest, Support Vector Machine, K-Nearest Neighbors. The hyperparameters grid considered respectively:

Logistic Regression:

- Strength of the regularization parameter for L1/L2/ElasticNet [0.5,0.75,1]
- Weighted/Unweighted cost function

Random Forest:

- Max depth of the trees [2,3,10,None]
- Minimum sample to consider a leaf [1,2]
- Minimum samples to consider a split [5]
- Number of trees [50,75,100,125,150]
- Weighted/Unweighted cost function

Support Vector Machine:

- Linear Kernel
- C parameter [0.5,1,5,10]
- Weighted/Unweighted cost function

K-Nearest Neighbors:

- Number of neighbors [2,5,10,20]
- Weights [Uniform, Distance]
- Weighted/unweighted cost function
- Leaf size [15,30,45]
- P parameter [1,2]

The aforementioned modeling pipeline has been applied on each classification task and Random Forest estimators consistently outperformed its competitors, albeit with varying hyperparameter sets.

### **Machine Learning Pipeline: Feature Importance**

Feature importance was estimated from the mean decrease in impurity within each tree.

## Supplementary Material – Figures

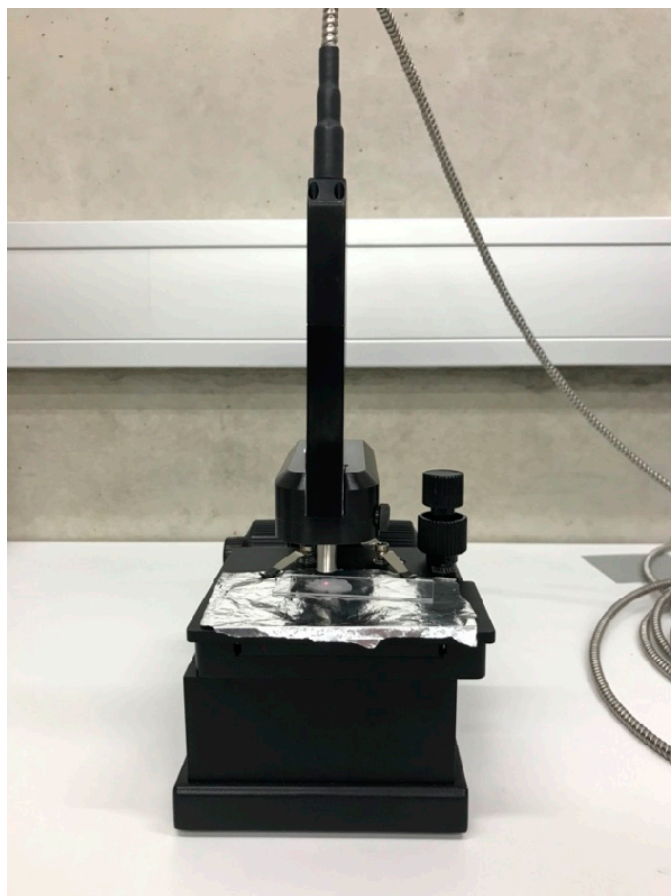

**Supplementary Figure S1** Raman Spectrometer set up during measurement. For sake of easier depiction, the dark chamber is not shown here.

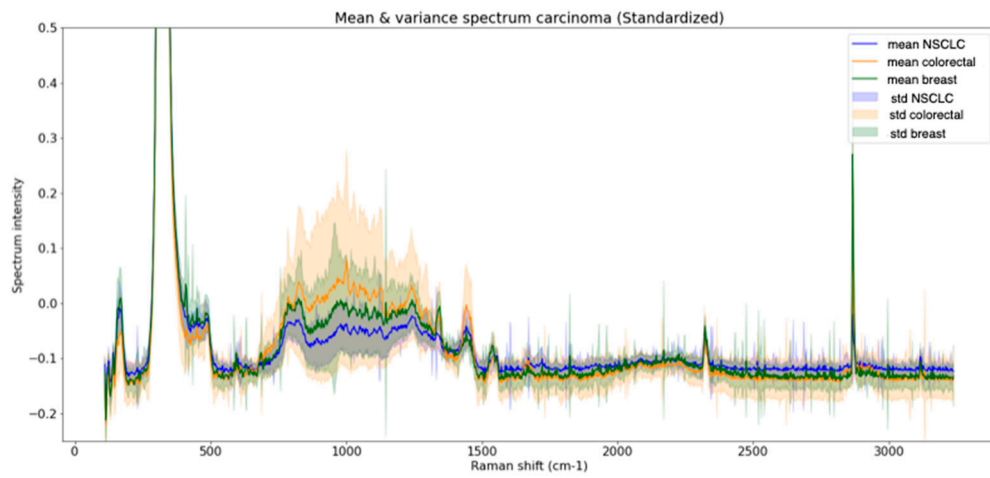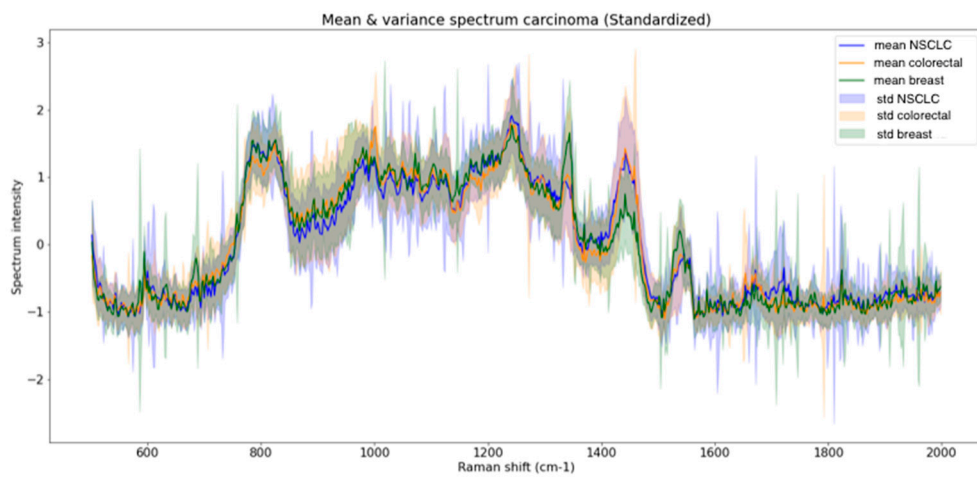

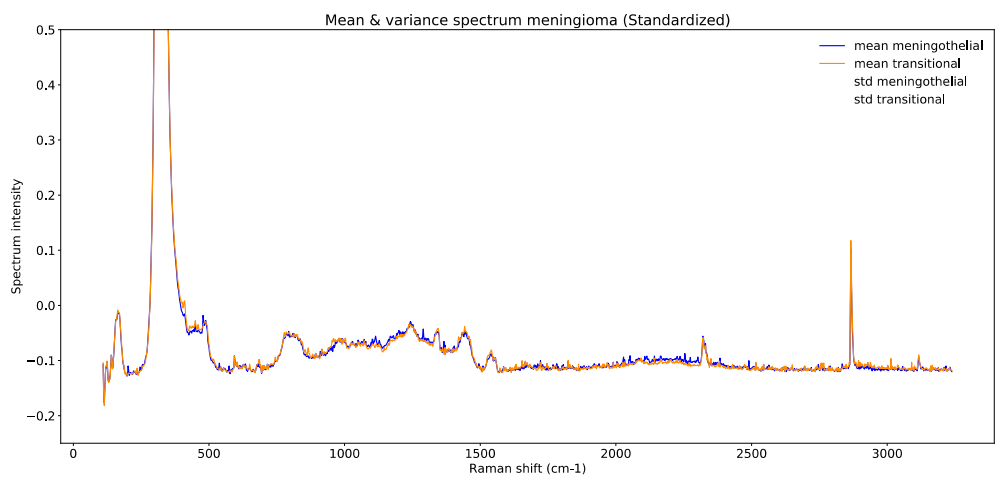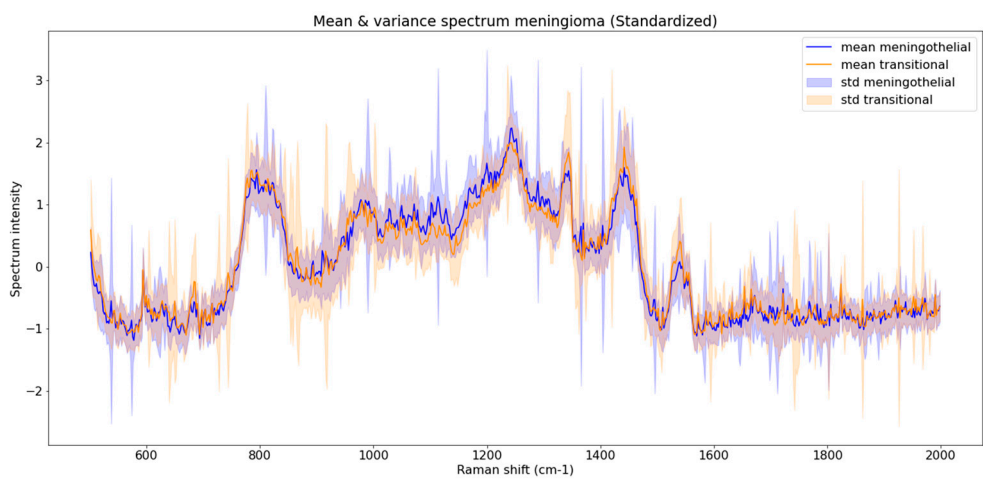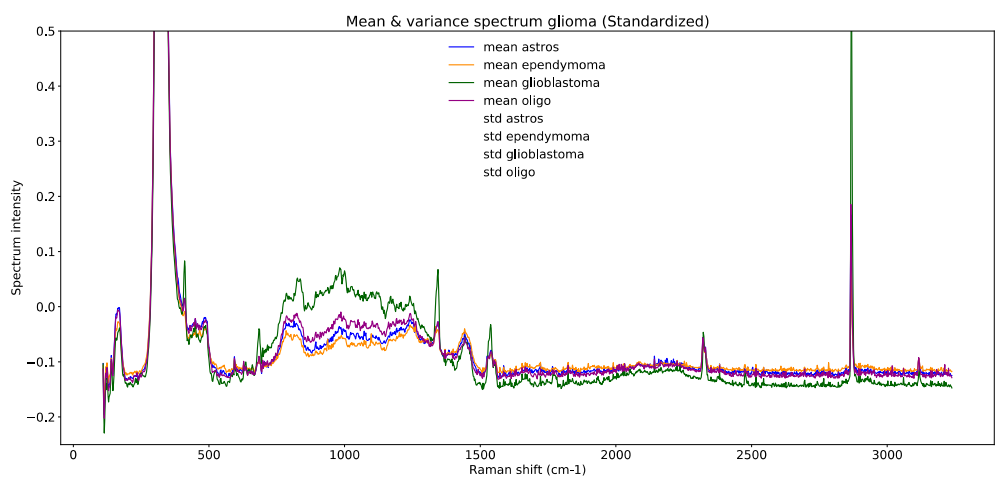

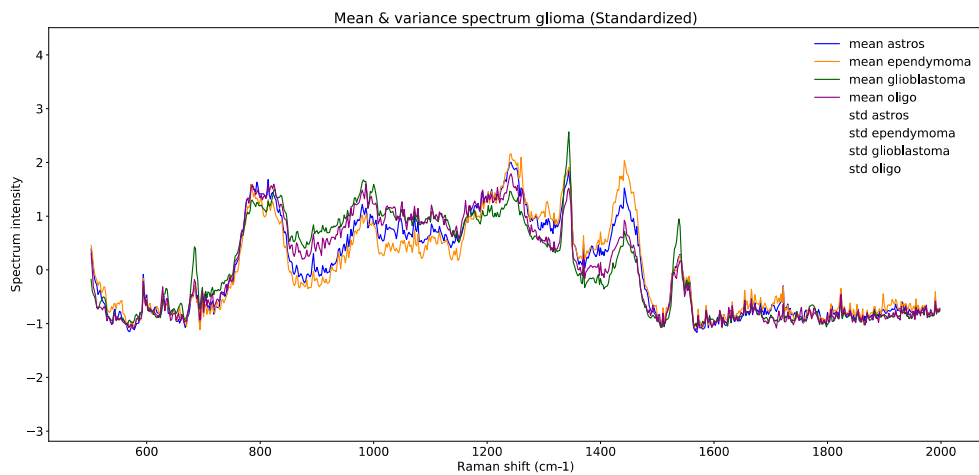

**Supplementary Figure S2** displays all raw Raman Spectra plus Raman spectra cropped within the “biological” wavenumber region  $500\text{cm}^{-1}$  and  $2000\text{cm}^{-1}$  below - sorted by tumor entity.

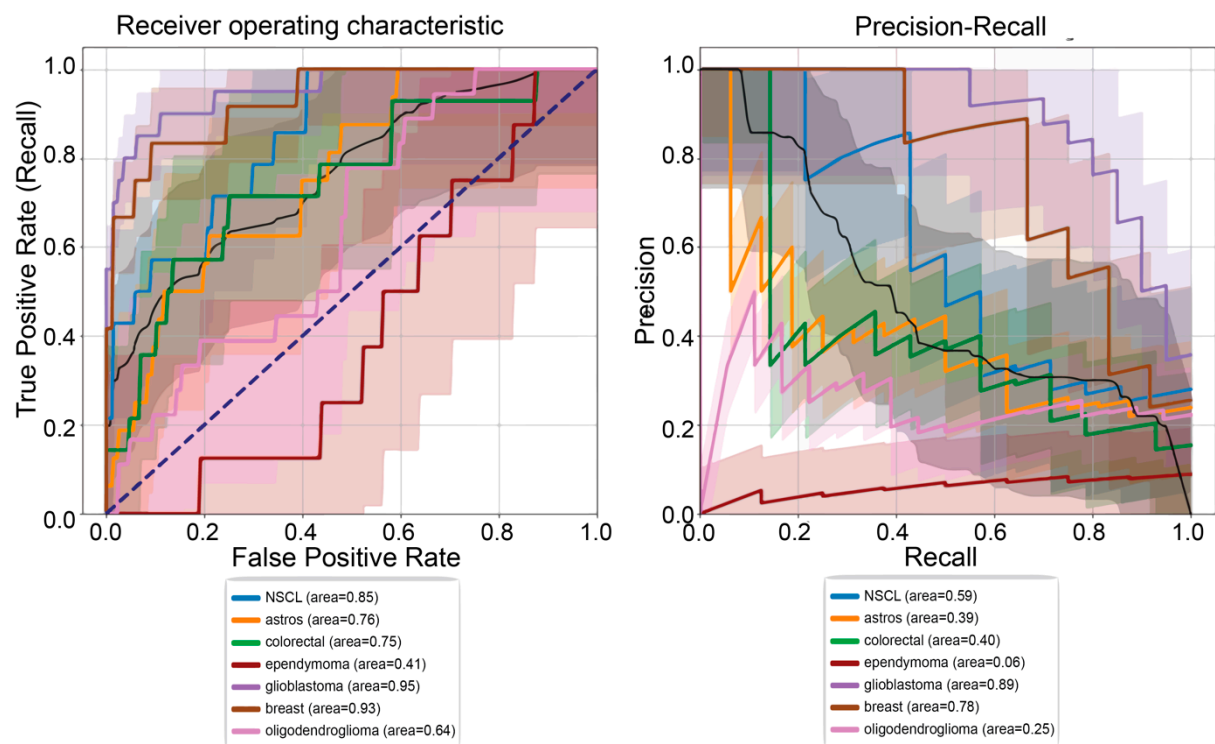

**Supplementary Figure S3.** ROC and PR curves as well as AUROC and AUPR values of the 7-class learning approach.

```

Accuracy: 0.32
Detail:
      precision    recall  f1-score

   NSCLC         0.36      0.57      0.44
  astrocytoma     0.23      0.69      0.35
   colorectal     0.00      0.00      0.00
   ependymoma     0.00      0.00      0.00
 glioblastoma     0.75      0.30      0.43
      breast     0.75      0.50      0.60
 oligod.glio.     0.25      0.11      0.15

   accuracy
 macro avg         0.34      0.31      0.28

```

**Supplementary Figure S4.** The metrics precision, recall, and f1-score of the 7-class learning approach are displayed.

```

Accuracy: 0.68
Detail:
      precision    recall  f1-score

   NSCLC         0.54      0.50      0.52
  colorectal     0.59      0.71      0.65
      mamma     1.00      0.83      0.91

   accuracy
 macro avg         0.71      0.68      0.69

```

**Supplementary Figure S5.** The metrics accuracy, precision, recall, and f1-score of the carcinoma brain metastases classifier are displayed.

```

Accuracy: 0.53
Detail:
      precision    recall  f1-score

   astros         0.57      0.72      0.63
  ependymoma     0.41      1.00      0.58
 glioblastoma     0.80      0.19      0.31
      oligo      0.58      0.50      0.54

   accuracy
 macro avg         0.59      0.60      0.52

```

**Supplementary Figure S6.** The metrics accuracy, precision, recall, and f1-score of glioma classifier are displayed.

|           |           |        |          |
|-----------|-----------|--------|----------|
| Accuracy: | 0.92      |        |          |
| Detail:   |           |        |          |
|           | precision | recall | f1-score |
| carcinoma | 0.82      | 0.93   | 0.88     |
| glioma    | 0.97      | 0.92   | 0.94     |
| accuracy  |           |        | 0.92     |
| macro avg | 0.90      | 0.93   | 0.91     |

**Supplementary Figure S7.** The metrics accuracy, precision, recall, and f1-score of binary necrosis classifier are displayed.

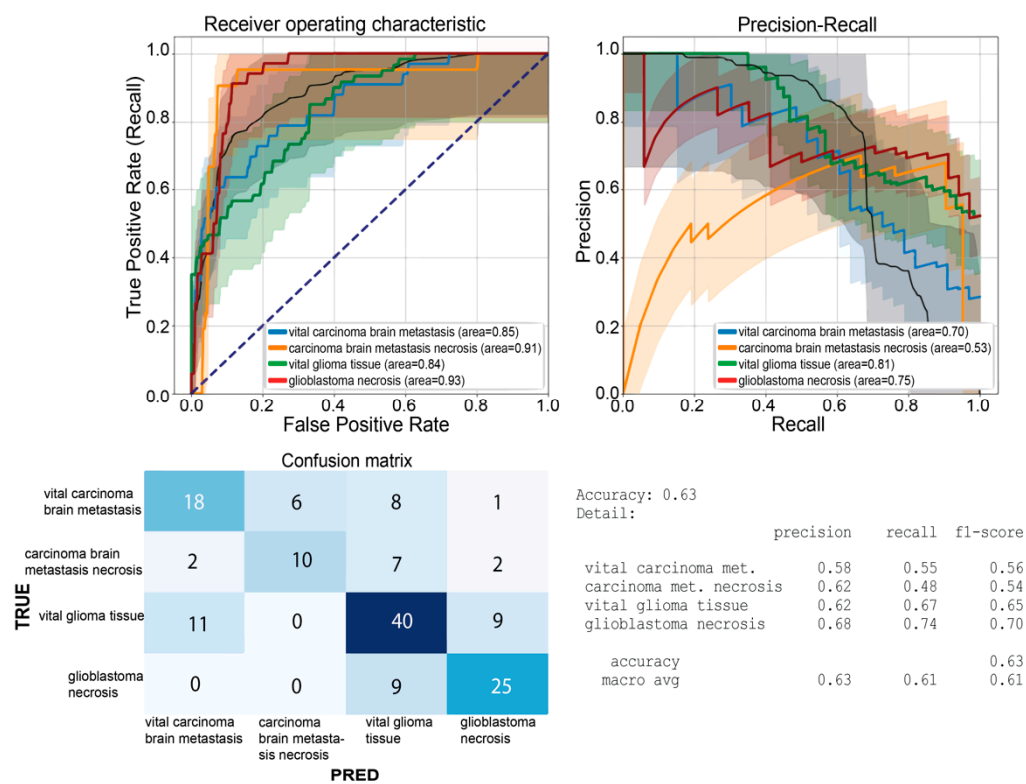

**Supplementary Figure S8.** ROC and PR curve, confusion matrix, as well as the metrics accuracy, precision, recall and f1-score of multiclass vital area vs. necrosis classifier are displayed.



|   | FrequencyBinsFeatures | Importance |    | FrequencyBinsFeatures | Importance |
|---|-----------------------|------------|----|-----------------------|------------|
| 0 | 682.0                 | 0.008510   | 0  | 684.0                 | 0.016167   |
| 1 | 918.0                 | 0.007418   | 1  | 682.0                 | 0.014295   |
| 2 | 1412.0                | 0.007313   | 2  | 1530.0                | 0.014041   |
| 3 | 1030.0                | 0.007168   | 3  | 686.0                 | 0.013992   |
| 4 | 1524.0                | 0.006880   | 4  | 1536.0                | 0.013743   |
| 5 | 808.0                 | 0.006739   | .. | ...                   | ...        |
| 6 | 1526.0                | 0.006531   | 95 | 1082.0                | 0.001832   |
| 7 | 1434.0                | 0.006487   | 96 | 1294.0                | 0.001828   |
| 8 | 1044.0                | 0.005974   | 97 | 1254.0                | 0.001825   |
| 9 | 1450.0                | 0.005758   | 98 | 520.0                 | 0.001811   |
|   |                       |            | 99 | 996.0                 | 0.001806   |

**Supplementary Figure S9.** Listed Raman bands and corresponding feature importance (FI) for classification is shown using two selected examples. Left: FI for the glioma classifier. Right: FI for the multiclass vital area vs. necrosis classifier.

## Supplementary Material – TABLES

**Supplementary Table S1.** Clinical information of measured glioma samples.

| sample number | tumor entity                    | age | sex    | localization       | features                                                                                  |
|---------------|---------------------------------|-----|--------|--------------------|-------------------------------------------------------------------------------------------|
| 1             | pilocytic astrocytoma, grade 1  | 11  | male   | posterior fossa    | flat copy number variation profile, no mutation in analyzed regions from BRAF, IDH1, IDH2 |
| 2             | diffuse astrocytoma, grade 2    | 22  | male   | left Wernicke area | IDH mutant, MGMT methylated                                                               |
| 3             | diffuse astrocytoma, grade 2    | 25  | male   | left frontal       | IDH mutant, MGMT methylated                                                               |
| 4             | diffuse astrocytoma, grade 2    | 41  | female | right temporal     | IDH mutant, gain of chromosome 7, partial loss of chromosome 13                           |
| 5             | diffuse astrocytoma, grade 2    | 44  | male   | right temporal     | IDH mutant, MGMT methylated                                                               |
| 6             | anaplastic astrocytoma, grade 3 | 33  | female | left temporal      | IDH mutant, MGMT methylated, partial losses of chromosome 3,5,9,11,13 and 22              |
| 7             | anaplastic astrocytoma, grade 3 | 32  | male   | cerebral           | IDH mutant, no CDKN2A/B deletion found                                                    |

|    |                                       |    |        |                        |                                                                                                                    |
|----|---------------------------------------|----|--------|------------------------|--------------------------------------------------------------------------------------------------------------------|
| 8  | anaplastic astrocytoma, grade 3       | 61 | male   | temporo-frontal        | IDH mutant, MGMT methylated, loss of chromosome 15, partial loss of chromosome 3 and 4, gain of chromosome 7 and 8 |
| 9  | anaplastic astrocytoma, grade 3       | 35 | female | left parietal          | IDH mutant, MGMT methylated, partial gains on chromosomes 7q and 12p.                                              |
| 10 | oligodendroglioma, grade 2            | 56 | male   | fronto-temporo-insular | IDH mutant, MGMT methylated, 1p/19q codeletion                                                                     |
| 11 | oligodendroglioma, grade 2            | 24 | male   | left insular-opercular | IDH mutant, MGMT methylated, 1p/19q codeletion                                                                     |
| 12 | oligodendroglioma, grade 2            | 38 | male   | left temporal          | IDH mutant, MGMT methylated, 1p/19q codeletion                                                                     |
| 13 | oligodendroglioma, grade 2            | 57 | female | left insular           | IDH mutant, MGMT methylated, 1p/19q codeletion                                                                     |
| 14 | anaplastic oligodendroglioma, grade 3 | 44 | female | left frontal           | IDH mutant, MGMT methylated, 1p/19q codeletion                                                                     |
| 15 | IDH mutant high-grade glioma grade 3  | 35 | female | left temporal          | IDH mutant, MGMT unmethylated, loss of 10, 11 and 19q, gain of chromosome 8                                        |

|    |                                                            |    |        |                        |                                                                       |
|----|------------------------------------------------------------|----|--------|------------------------|-----------------------------------------------------------------------|
| 16 | anaplastic oligodendroglioma, grade 3                      | 33 | male   | right temporal         | IDH mutant, MGMT methylated, 1p/19q codeletion                        |
| 17 | myxopapillary ependymoma                                   | 50 | female | L1-L3                  | not specified                                                         |
| 18 | ependymoma, grade 2 (spinal)                               | 50 | female | intramedullar          | MGMT unmethylated, partial losses of chromosome 1, 13, 14, 21 and 22  |
| 19 | ependymoma with focal features of a subependymoma, grade 2 | 75 | female | right intraventricular | MGMT methylated, partial loss of chromosome 13q, gain of chromosome 5 |
| 20 | anaplastic ependymoma, grade 3 (spinal)                    | 38 | male   | intramedullar Th1-Th5  | MGMT unmethylated, multiple chromosomal gains and losses              |
| 21 | anaplastic ependymoma, grade 3 (supratentorial)            | 21 | male   | right frontal          | MGMT unmethylated, RELA fusion positive                               |
| 22 | glioblastoma, grade 4                                      | 50 | female | bifrontal              | IDH wildtype; subclass RTK II; MGMT methylated                        |
| 23 | glioblastoma, grade 4                                      | 66 | male   | left frontal           | IDH wildtype; subclass RTK II; MGMT methylated                        |
| 24 | glioblastoma, grade 4                                      | 62 | male   | left temporal          | IDH wildtype; subclass RTK II; MGMT unmethylated                      |
| 25 | glioblastoma, grade 4                                      | 61 | male   | right fronto-temporal  | IDH wildtype; subclass mesenchymal; MGMT methylated                   |
| 26 | glioblastoma, grade 4                                      | 57 | male   | right frontal          | IDH wildtype; subclass RTK I; MGMT unmethylated                       |

|    |                       |    |        |                       |                                                                       |
|----|-----------------------|----|--------|-----------------------|-----------------------------------------------------------------------|
| 27 | glioblastoma, grade 4 | 56 | male   | left occipital        | IDH wildtype; subclass mesenchymal; MGMT not interpretable            |
| 28 | glioblastoma, grade 4 | 62 | male   | right frontal         | IDH wildtype; subclass mesenchymal; MGMT unmethylated                 |
| 29 | glioblastoma, grade 4 | 72 | female | right temporal        | IDH wildtype; subclass RTK II; MGMT methylated                        |
| 30 | glioblastoma, grade 4 | 60 | male   | left temporal         | IDH wildtype; subclass RTK II; MGMT unmethylated                      |
| 31 | glioblastoma, grade 4 | 54 | male   | right frontal         | highest score: IDH, wildtype; subclass mesenchymal; MGMT unmethylated |
| 32 | glioblastoma, grade 4 | 74 | female | right postcentral     | IDH wildtype; subclass RTK II; MGMT unmethylated                      |
| 33 | glioblastoma, grade 4 | 44 | female | left temporal         | highest score: IDH, wildtype; subclass mesenchymal; MGMT methylated   |
| 34 | glioblastoma, grade 4 | 50 | male   | right temporal        | highest score: IDH, wildtype; subclass mesenchymal; MGMT unmethylated |
| 35 | glioblastoma, grade 4 | 70 | male   | left temporo-dorsal   | IDH wildtype; subclass RTK II; MGMT unmethylated                      |
| 36 | glioblastoma, grade 4 | 61 | male   | parieto occipital     | IDH wildtype; subclass RTK II; MGMT methylated                        |
| 37 | glioblastoma, grade 4 | 61 | male   | right fronto-temporal | IDH wildtype; subclass mesenchymal; MGMT methylated                   |
| 38 | glioblastoma, grade 4 | 54 | female | left occipital        | IDH wildtype; subclass RTK I; MGMT unmethylated                       |
| 39 | glioblastoma, grade 4 | 67 | male   | left temporo-insular  | IDH wildtype; subclass mesenchymal; MGMT not interpretable            |

|    |                       |    |        |                         |                                                                    |
|----|-----------------------|----|--------|-------------------------|--------------------------------------------------------------------|
| 40 | glioblastoma, grade 4 | 72 | male   | right opercular         | IDH wildtype; subclass RTK II; MGMT methylated                     |
| 41 | glioblastoma, grade 4 | 64 | male   | right fronto-dorsal     | IDH wildtype; subclass mesenchymal; MGMT methylated                |
| 42 | glioblastoma, grade 4 | 69 | male   | left fronto-parietal    | IDH wildtype; subclass RTK I; MGMT unmethylated                    |
| 43 | glioblastoma, grade 4 | 50 | female | left temporal           | highest score: IDH wildtype; subclass mesenchymal, MGMT methylated |
| 44 | glioblastoma, grade 4 | 48 | male   | right parietal          | IDH wildtype; subclass RTK II; MGMT unmethylated                   |
| 45 | glioblastoma, grade 4 | 64 | male   | left temporal           | IDH wildtype; subclass RTK II; MGMT methylated                     |
| 46 | glioblastoma, grade 4 | 64 | female | right occipital         | IDH wildtype; subclass mesenchymal; MGMT methylated                |
| 47 | glioblastoma, grade 4 | 59 | female | right parieto-occipital | highest score: IDH wildtype; MGMT non conclusive                   |
| 48 | glioblastoma, grade 4 | 54 | female | left occipital          | IDH wildtype; subclass RTK I; MGMT unmethylated                    |

**Supplementary Table S2.** Deparaffinization protocol to reduce influence of residual wax on biological spectroscopic signal.

|                                                               |             |
|---------------------------------------------------------------|-------------|
| Deparaffinization protocol (CaF2 slide; tissue thickness 7µm) | duration    |
| heating at 60°                                                | 60 min      |
| Xylene bath                                                   | 15 min      |
| Xylene bath                                                   | 15 min      |
| ethanol (99%) bath                                            | 2 min       |
| ethanol (96%) bath                                            | 2 min       |
| ethanol (70%) bath                                            | 2 min       |
| water bath (rehydration)                                      | few seconds |

**Supplementary Table S3.** Data details for training and the external validation data set split for initial 3 class analysis. Above: Training data set. Bottom: Test data set.

| class                                                                           | patients (n) | measurements (n) |
|---------------------------------------------------------------------------------|--------------|------------------|
| carcinoma metastases (NSLC, colorectal, breast)                                 | 17           | 114              |
| primary brain tumors (astrocytoma, ependymoma, oligodendroglioma, glioblastoma) | 24           | 182              |
| meningeal tumors (meningioma transitional / meningothelial)                     | 8            | 72               |
| class                                                                           | patients (n) | measurements (n) |
| carcinoma metastases (NSCLC, colorectal, breast)                                | 6            | 40               |
| primary brain tumors (astrocytoma, ependymoma, oligodendroglioma, glioblastoma) | 8            | 62               |
| meningeal tumors (meningioma transitional / meningothelial)                     | 2            | 20               |

Total number of patients, n = 65. Total number of measurements n = 490.

**Supplementary Table S4.** Carcinoma classifier data. Above: Training data set. Bottom: Test data set.

| class      | patients (n) | measurements (n) |
|------------|--------------|------------------|
| NSCLC      | 7            | 58               |
| colorectal | 4            | 23               |
| breast     | 6            | 33               |
|            |              |                  |
| class      | patients (n) | measurements (n) |
| NSCLC      | 2            | 14               |
| colorectal | 2            | 14               |
| breast     | 2            | 12               |

**Supplementary Table S5.** Glioma classifier data. Above: Training data set. Bottom: Test data set.

| class             | patients (n) | measurements (n) |
|-------------------|--------------|------------------|
| astrocytoma       | 7            | 56               |
| oligodendroglioma | 5            | 46               |
| ependymoma        | 4            | 35               |
| glioblastoma      | 8            | 45               |
|                   |              |                  |
| class             | patients (n) | measurements (n) |
| astrocytoma       | 2            | 18               |
| oligodendroglioma | 2            | 14               |
| ependymoma        | 1            | 9                |
| glioblastoma      | 3            | 21               |



**Supplementary Table S6.** Multiclass necrosis vs. vital tissue data; Above: Training data set.  
Bottom: Test data set.

| class                             | tumor origin              | number of patients | number of measurements |
|-----------------------------------|---------------------------|--------------------|------------------------|
| necrosis - carcinoma metastases   | NSCLC, colorectal, breast | 10                 | 55                     |
| vital area - carcinoma metastases | NSCLC, colorectal, breast | 17                 | 121                    |
| necrosis - glioblastoma           | primary brain tumor       | 14                 | 79                     |
| vital area - glioma               | primary brain tumors      | 24                 | 184                    |
| class                             | tumor origin              | number of patients | number of measurements |
| necrosis - carcinoma metastases   | NSCLC, colorectal, breast | 3                  | 21                     |
| vital area - carcinoma metastases | NSCLC, colorectal, breast | 6                  | 33                     |
| necrosis - glioblastoma           | primary brain tumors      | 5                  | 34                     |
| vital area - glioma               | primary brain tumors      | 8                  | 60                     |
